# Supplementary material
Source: Springer Nature journal article supplement (https://www.springermedizin.de/resource/supplementary/13058_2010_9495_MOESM2_ESM.pdf/9702272)
Supplement: MOESM2 [file 9702272]

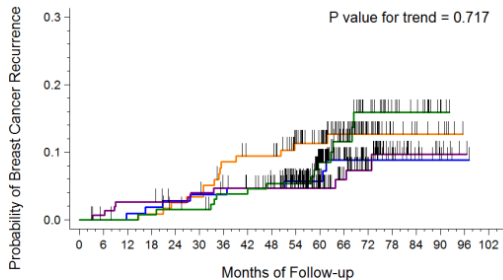

Number at risk

|    |     |     |     |     |     |    |    |    |   |
|----|-----|-----|-----|-----|-----|----|----|----|---|
| 1Q | 119 | 118 | 114 | 106 | 103 | 74 | 30 | 8  | 0 |
| 2Q | 109 | 107 | 105 | 102 | 97  | 63 | 22 | 8  | 1 |
| 3Q | 152 | 147 | 144 | 140 | 137 | 91 | 43 | 10 | 1 |
| 4Q | 134 | 133 | 130 | 124 | 119 | 76 | 30 | 12 | 0 |

(a) Adiponectin

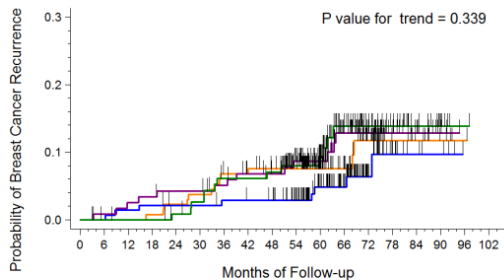

Number at risk

|    |     |     |     |     |     |    |    |    |   |
|----|-----|-----|-----|-----|-----|----|----|----|---|
| 1Q | 134 | 133 | 130 | 123 | 117 | 72 | 32 | 9  | 1 |
| 2Q | 142 | 139 | 136 | 134 | 132 | 88 | 30 | 6  | 0 |
| 3Q | 120 | 116 | 113 | 110 | 104 | 75 | 34 | 10 | 0 |
| 4Q | 118 | 117 | 114 | 105 | 103 | 69 | 29 | 13 | 1 |

(b) Leptin

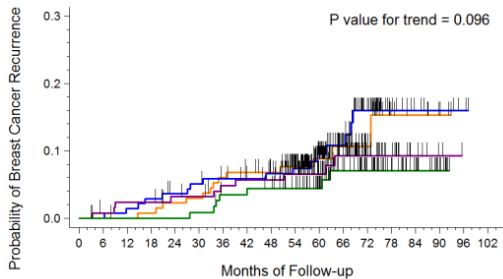

Number at risk

|    |     |     |     |     |     |    |    |    |   |
|----|-----|-----|-----|-----|-----|----|----|----|---|
| 1Q | 135 | 133 | 129 | 123 | 117 | 68 | 21 | 6  | 0 |
| 2Q | 138 | 136 | 131 | 126 | 122 | 80 | 33 | 6  | 2 |
| 3Q | 126 | 122 | 119 | 115 | 111 | 77 | 29 | 7  | 0 |
| 4Q | 115 | 114 | 114 | 108 | 106 | 80 | 42 | 19 | 0 |

(c) HOMA-IR

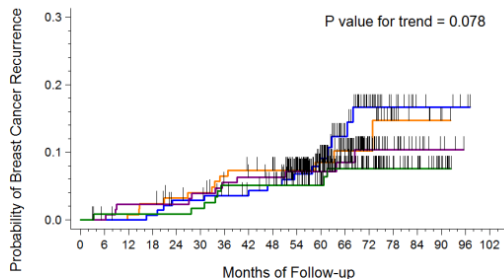

Number at risk

|    |     |     |     |     |     |    |    |    |   |
|----|-----|-----|-----|-----|-----|----|----|----|---|
| 1Q | 126 | 123 | 119 | 114 | 110 | 71 | 23 | 5  | 0 |
| 2Q | 141 | 140 | 134 | 130 | 123 | 70 | 26 | 5  | 2 |
| 3Q | 129 | 126 | 124 | 119 | 116 | 82 | 29 | 8  | 0 |
| 4Q | 118 | 116 | 116 | 109 | 108 | 82 | 47 | 20 | 0 |

(d) Insulin
